# Supplementary material
Source: publisher figshare collection journal article supplement (https://tandf.figshare.com/ndownloader/files/17090276)
Supplement: Supplementary file 1 [file 17090276]

**Preliminary Questions**

1. Email address
2. What is your full name?
3. How old are you?
4. Are you in college? If so, what class rank? If not, what do you do?
5. Who’s in your family?
6. Where did you grow up?
7. Where is/are your parent(s) from?
8. Do you have any siblings? If so, (1) how many, (2) how old, and (3) were they also adopted?
9. How old were you at the time of your adoption?

**The Interview Protocol**

1. **Warm up Question:** This study is delving deeper into understanding Chinese-adoptees bicultural identities. Just out of curiosity, when you were adopted, did you have a Chinese name?
2. **Adoption Related Questions:**
   1. Do you know other adopted individuals?
      1. How do you know them?
      2. Are they your friends?
      3. Do you feel connected to them?
      4. Why do you think that is?
   2. Is your adoptive identity something you often think about?
   3. What does your adopted identity mean to you?
3. **Family Related Questions:**
   1. How did it feel to grow up with two white parents?
   2. How would you describe your relationship with your parents?
   3. Have you experienced a moment when you perceived your parents’ identity to be different from yours?
      1. What do the similarities/differences mean to you? How do they affect the relationship you have with your parents?
   4. In what ways do you believe your parents influenced the formation of your cultural identity?
      1. Does your mom or dad influence that cultural identity more?
   5. Have you and your parents discussed issues related to race/ethnicity?
      1. What did the conversations look like?
      2. Who brought them up?
   6. Do you perceive any gaps between your parents’ and your own perceptions of your cultural heritage?
      1. Do you think the way you view your heritage is the same way that your parents view it?
      2. If so, how did you manage these gaps and negotiated these differences?
   7. Have you ever felt excluded from your family?
   8. Do you know if your parents did research on bringing a Chinese daughter into their family?
   9. Did your parents ever encourage identification or try to connect you with your Chinese roots?
   10. Do you think that parents should be more integrative in constructing a sense of heritage?
   11. Do you wish your parents had done more?
4. **Society Related Questions**
   1. Tell me about the community you grew up in.
   2. What kind of schools did you attend? (Private, public, charter, ethnic, white, etc)
   3. Have you ever felt discriminated against?
      1. In what context?
      2. How did it make you feel?
      3. What were your reactions?
   4. Tell me a little bit about your friend group
      1. who are your closest friends?
      2. How did you meet?
      3. What ethnicity are they?
      4. When do you disclose adoption status to them?
   5. Do you perceive yourself to be different from your peers or similar?
      1. Why do you think so? What do those similarities/differences mean to you?
   6. Have you encountered a situation where you were made to think you were different from your peers?
   7. What are the most salient factors of your identity and what do you think are the most salient factors of your peers’ identities? (Ex. Race, ethnicity, institutions, friends, family, etc.)
   8. Do you ever find yourself discussing race/ethnicity/identity with those around you?
      1. In what contexts?
      2. How do the conversations make you feel?
   9. Do you think there are any gaps between what your peers think and what you think about your identity/culture?
   10. Have you ever experienced your friends making comments along the lines of, “you’re not real Chinese” or “you’re white inside”?
       1. When did you first become aware of these comments?
       2. How do these comments make you feel?
       3. Have they changed over the years?
       4. Do those comments ever bother you?
   11. Explain your view on being Chinese in America versus being Chinese-American.
   12. Tell me about the people you’ve dated.
       1. Is there a particular race or ethnicity you date within?
   13. In what ways do you believe your peers/community influenced the formation of your cultural identity?
   14. Do you think that the people around you see your race?
5. **Race/Cultural Identity Related Questions**
   1. Does race matter to you?
   2. Do you ever think about your physical appearance?
      1. When are you most aware of it?
   3. How is your racial/ethnic identity different from your cultural identity?
      1. What do both mean to you? Are they unique?
   4. Do you remember a time or an incident when you first became aware that you might somehow be different (i.e. racially)
      1. How did you feel and respond?
   5. What do you say when someone asks what your racial/ethnic background is?
      1. Has it changed over time?
   6. Have you encountered any dilemmas in describing who you are?
6. **Personal Related Questions**
   1. Have you done anything to enhance your connection with your Chinese cultural heritage?
      1. If yes, what was it like?
      2. How old were you?
      3. Who did you go with?
      4. How long were you there for?
      5. If no, why do you think that is?
      6. Do you wish to return?
   2. Can you think of any critical turning points in your identity?
   3. Tell me about your interaction with other Chinese individuals (adopted and non).
      1. Do you perceive any differences in the relationships you’ve had with them versus your European American peers?
      2. How do these relationship patterns influence your perception about your cultural identity?
   4. Do you feel more strongly connected to either your Chinese or your American identity?
   5. Do you ever experience guilt as a result of assuming a stronger affiliation with your American identity?
   6. Do you feel it is important for you to know about your Chinese roots?
   7. Do you wish to seek out more opportunities to identify with your cultural heritage?
